# Supplementary material
Source: Springer Nature journal article supplement (https://www.springermedizin.de/resource/supplementary/13069_2012_104_MOESM2_ESM.pdf/9659732)
Supplement: MOESM2 [file 9659732]

**Lung Injury (known or unknown)  
combined with  
Tissue Response (normal or abnormal)**

**Inflammation**

**Oxidative  
Stress**

**Coagulation  
disturbances**

**Resident  
fibroblasts:**  
proliferation,  
resistance to  
apoptosis,  
differentiation into  
myofibroblasts,  
collagen production

**Bone marrow-  
derived fibroblast  
precursors:**  
homing to the  
lungs, differentiation  
into myofibroblasts

**Epithelial injury  
and apoptosis:**  
disturbed  
interaction with  
mesenchymal cells,  
epithelial-  
mesenchymal  
transition (EMT)

**Excess deposition and/or reduced turnover of  
extracellular matrix (ECM)**

**PULMONARY FIBROSIS**
